# Supplementary material for: Interplay between nutrient transporters ensures fertility in the malaria mosquito Anopheles gambiae
Source: PubMed Central journal article supplement — bioRxiv. 2023 Jun 3:2023.06.02.543516. Preprint. [Version 1] doi: 10.1101/2023.06.02.543516 (PMC10312589; doi:10.1101/2023.06.02.543516), 2023-06-03
Supplement: NIHPP2023.06.02.543516v1-supplement-3.pdf [file NIHPP2023.06.02.543516v1-supplement-3.pdf]

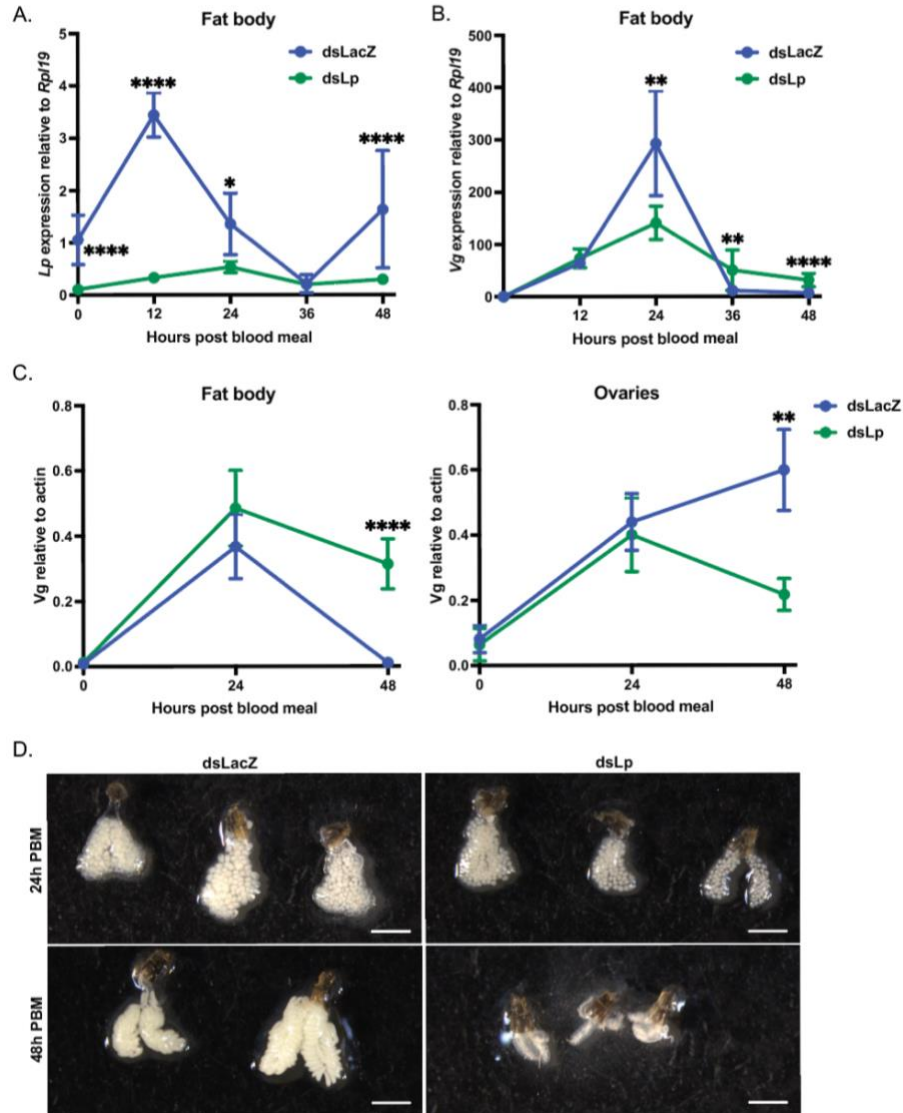

**Supplemental Figure 1. *Lp* knockdown significantly impairs oogenesis and affects Vg expression and localization.** (A) Successful *Lp* knockdown as determined by RT-qPCR of *Lp* expression levels relative to *Rpl19* in the fat body of dsLacZ and dsLp females (REML variance component analysis: \* =  $p < 0.05$ ; \*\*\*\* =  $p < 0.0001$ ; three biological replicates). (B) RT-qPCR of *Vg* expression levels relative to *Rpl19* in the fat body of dsLacZ and dsLp females (REML variance component analysis: \*\* =  $p < 0.01$ ; \*\*\*\* =  $p < 0.0001$ ; four biological replicates). (C) Western blot quantification from Figure 1C showing an accumulation of Vg in the fat body and a decrease of Vg in the ovaries upon *Lp* knockdown (REML variance component analysis: \*\* =  $p < 0.01$ ; \*\*\*\* =  $p < 0.0001$ ; three biological replicates). (D) Images of ovaries at 24 and 48h post blood meal showing that *Lp* depleted ovaries develop normally at first before degenerating by 48h; scale bar = 2mm.

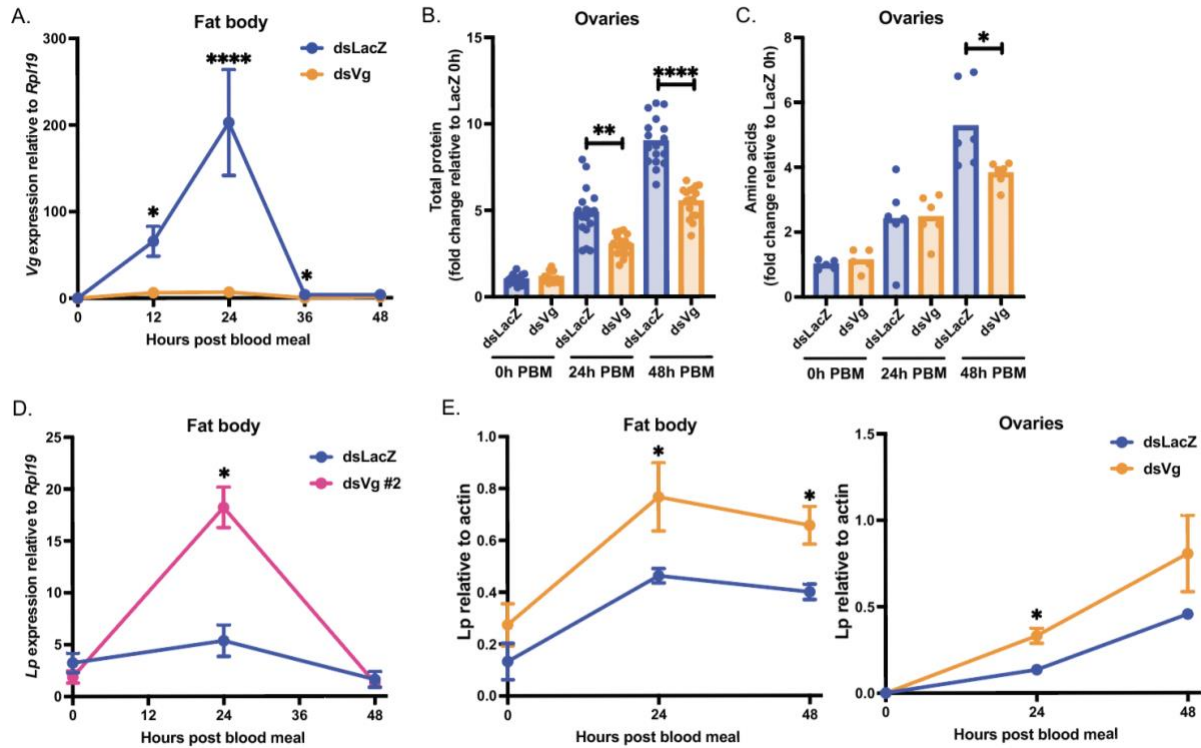

**Supplemental Figure 2. *Vg* knockdown effects in fat body and ovaries.** (A) Successful *Vg* knockdown as determined by RT-qPCR of *Vg* expression levels relative to *Rpl19* in the fat body (REML variance component analysis: \* =  $p < 0.05$ ; \*\*\*\* =  $p < 0.0001$ ; three biological replicates). (B) Fold change in protein levels measured by Bradford assay in the ovaries of dsLacZ and dsVg females before blood meal and at 24h and 48h post blood meal (PBM); each dot is representative of three ovaries (REML variance component analysis by timepoint: \*\* =  $p < 0.01$ ; \*\*\*\* =  $p < 0.0001$ ; three biological replicates). (C) Fold change in free amino acid levels in the ovaries of dsLacZ and dsVg females before blood meal and at 24h and 48h PBM; each dot is representative of five ovaries (REML variance component analysis by timepoint: \* =  $p < 0.05$ ; three biological replicates). (D) *Vg* knockdown by second target also results in an increase in *Lp* levels as determined by RT-qPCR (REML variance component analysis: \* =  $p < 0.05$ ; three biological replicates). (E) Western blot quantification from Figure 2G showing an accumulation of *Lp* in the fat body and ovaries upon *Vg* knockdown (REML variance component analysis: fat body – dsRNA:  $p < 0.01$ ; \* =  $p < 0.05$ ; ovaries – dsRNA:  $p < 0.05$ ; \* =  $p < 0.05$ ; three biological replicates).

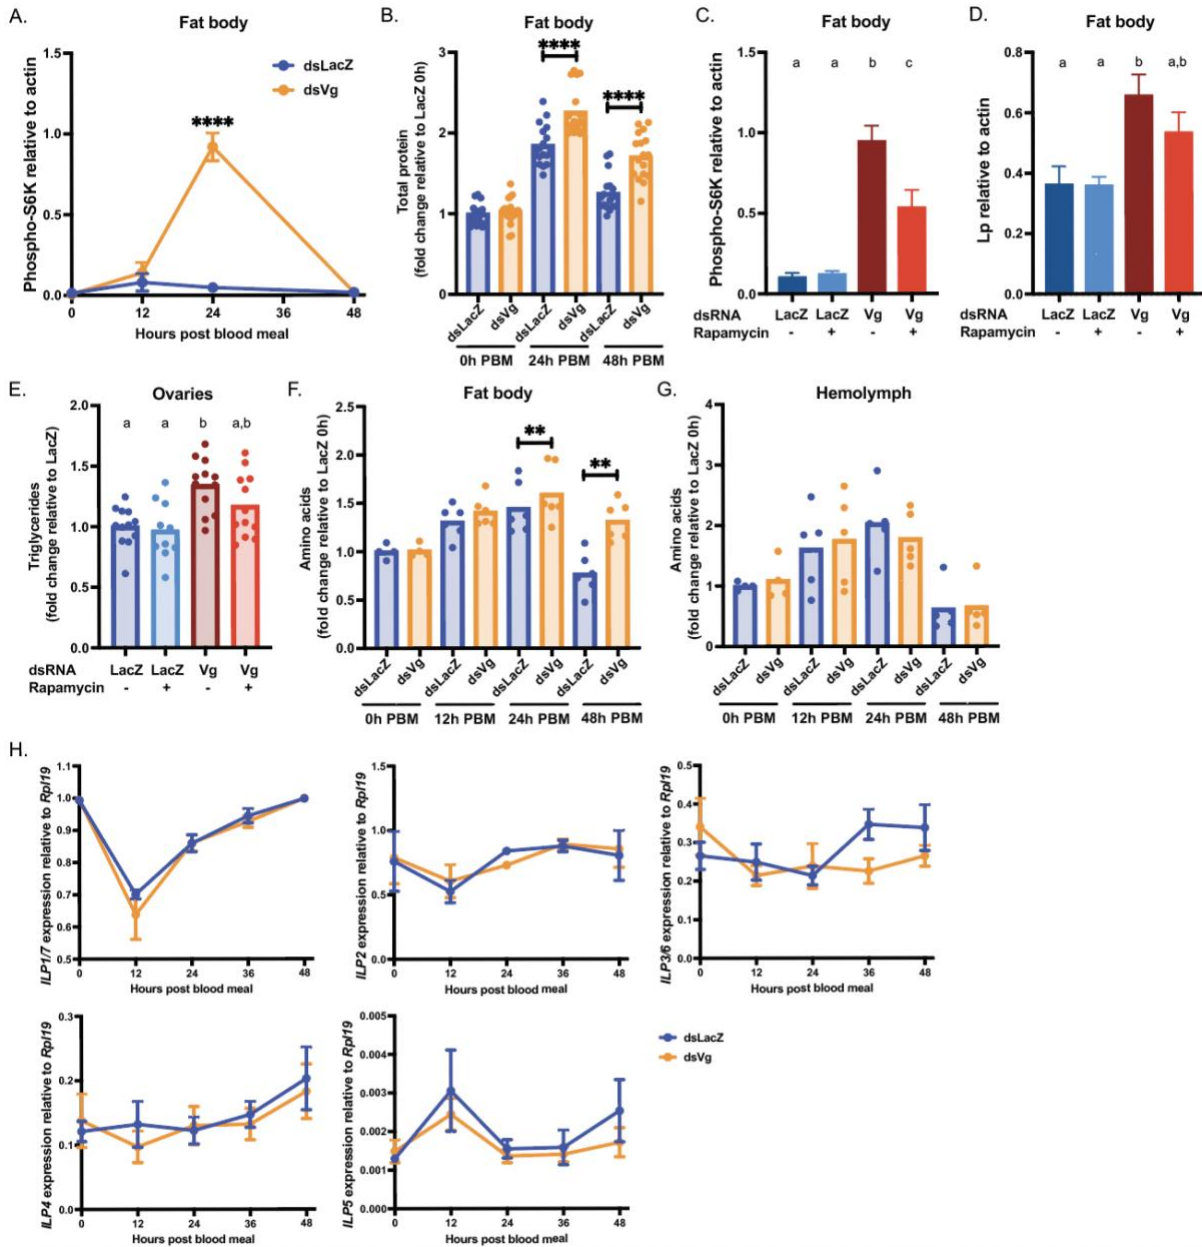

**Supplemental Figure 3. *Vg* expression regulates Lp-mediated accumulation of lipids via TOR signaling.** (A) Western blot quantification from Figure 3B showing an increase in phospho-S6K levels in the fat body upon *Vg* knockdown (REML variance component analysis: \*\*\*\* =  $p < 0.0001$ ; three biological replicates). (B) Fold change in protein levels, measured by Bradford assay of the fat body are increased in ds*Vg* females; each dot is representative of three fat bodies (REML variance component analysis by timepoint: \*\*\*\* =  $p < 0.0001$ ; three biological replicates). (C) Western blot quantification from Figure 3D showing a decrease in phospho-S6K levels in the fat body upon rapamycin treatment (ANOVA; three biological replicates). (D) Western blot quantification from Figure 3E showing Lp protein levels upon *Vg* knockdown and rapamycin treatment (ANOVA; three biological replicates). (E) Triglyceride levels measured in dsLacZ and ds*Vg* ovaries upon 0.5  $\mu$ l of 40 $\mu$ M rapamycin treatment at 72h post blood meal and normalized to

**Supplemental Table 1:** Vg amino acids and their decrease in embryos upon Vg depletion.

| <b>Amino acid</b> | <b>Percent content in Vg</b> | <b>Decrease upon Vg KD in mothers (fold change)</b> | <b>Significance</b> |      |
|-------------------|------------------------------|-----------------------------------------------------|---------------------|------|
| Ser (S)           | 8.50%                        | 2.2                                                 | 0.09205             |      |
| Tyr (Y)           | 8.00%                        | 52.6                                                | 0.00010             | ***  |
| Phe (F)           | 7.70%                        | 63.2                                                | 0.00000             | **** |
| Glu (E)           | 6.50%                        | 1.2                                                 | 0.33025             |      |
| Ala (A)           | 6.30%                        | 2.0                                                 | 0.02859             | *    |
| Asp (D)           | 6.30%                        | 2.1                                                 | 0.15012             |      |
| Lys (K)           | 6.20%                        | 10.0                                                | 0.00000             | **** |
| Gln (Q)           | 6.10%                        | 1.1                                                 | 0.88614             |      |
| Val (V)           | 5.80%                        | 3.1                                                 | 0.00005             | **** |
| Asn (N)           | 5.60%                        | 5.5                                                 | 0.00006             | **** |
| Leu (L)           | 5.60%                        | 3.7                                                 | 0.00024             | ***  |
| Gly (G)           | 4.40%                        | 2.2                                                 | 0.02060             | *    |
| Pro (P)           | 4.40%                        | 1.4                                                 | 0.01066             | *    |
| Thr (T)           | 4.40%                        | 3.9                                                 | 0.00015             | ***  |
| Arg (R)           | 3.90%                        | 2.9                                                 | 0.00012             | ***  |
| Ile (I)           | 3.20%                        | 8.7                                                 | 0.00001             | **** |
| His (H)           | 2.90%                        | 1.0                                                 | 0.69815             |      |
| Met (M)           | 2.20%                        | 4.9                                                 | 0.00010             | ***  |
| Cys (C)           | 1.10%                        | Not detected                                        |                     |      |
| Trp (W)           | 0.80%                        | 13.2                                                | 0.00002             | **** |

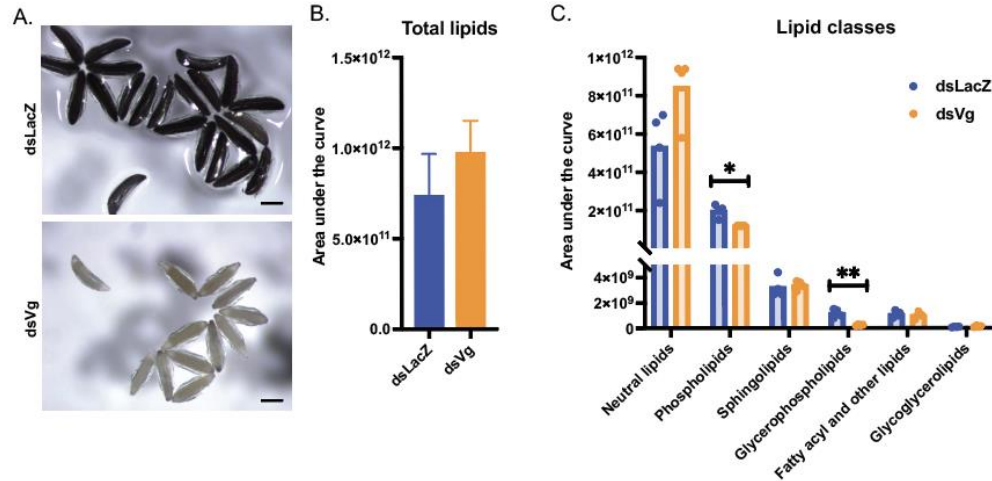

**Supplemental Figure 4. *Vg* knockdown in females prevents embryo melanization and causes early embryonic arrest.** (A) Light microscopy of embryos from dsLacZ- and dsVg-derived females at 3-5h post oviposition; scale bar = 200  $\mu$ m. (B-C) Total lipids (B) and lipid classes (C) in dsLacZ- and dsVg-derived embryos 3-5h post oviposition as determined by mass spectrometry (unpaired t tests, followed by FDR correction: \* =  $p < 0.05$ ; \*\* =  $p < 0.01$ ; four biological replicates).

**Supplemental Table 4**

| <b>Gene</b> | <b>Primer</b>                                              | <b>Citation, if previously published</b> |
|-------------|------------------------------------------------------------|------------------------------------------|
| Rpl19       | F CCAACTCGCGACAAAACATTC<br>R ACCGGCTTCTTGATGATCAGA         | Werling, Shaw, Itoe et al., 2019         |
| Lp          | F CAGCCAGGATGGTGAGCTTAA<br>R CACCAGCACCTTGCGTT             | Werling, Shaw, Itoe et al., 2019         |
| Vg          | F CCGACTACGACCAGGACTTC<br>R CTTCCGGCGTAGTAGACGAA           | Werling, Shaw, Itoe et al., 2019         |
| ILP1/7      | F GCAAAAAGTCCGAGAATCTACTGATGA<br>R CGAACGATCGTTCAATGTGTGGA |                                          |
| ILP2        | F CTACCTCTACGCCAACAGC<br>R CGTGTACATAATCTGTGCGATAGTG       |                                          |
| ILP3/6      | F GGTAAAGGTACTGTCCTTCCTG<br>R AGTATCTGCTGCGTGTGTC          | Arsic and Guerin, 2008                   |
| ILP4        | F TCTCCGAAAGAACACAGTTGA<br>R GGTTTCTGCCTGAACCACAT          | Arsic and Guerin, 2008                   |
| ILP5        | F GTGGCACCAGGAGAGTCATT<br>R GCCCAGTACAGATGGCGTAT           |                                          |

**Supplemental Table 5.** Details of statistical tests and outputs are summarized for each figure. For qRT-PCR, at least three independent biological replicates of a gene expression timecourse were analyzed, except for ILP1, where one replicate was excluded as an outlier. Effect test outputs are reported here. Multiple comparisons were calculated using pairwise Student's t tests at each timepoint followed by FDR correction (see **Table S6**). KD = knock down; rand = random effect; FDR = false discovery rate.

| <b>Fig</b> | <b>Comparison</b>                       | <b>Statistical test</b>                                                                                       | <b>Effect Test Outputs</b>                                                                                                            |
|------------|-----------------------------------------|---------------------------------------------------------------------------------------------------------------|---------------------------------------------------------------------------------------------------------------------------------------|
| <b>1A</b>  | Egg number after Lp KD                  | Mann-Whitney                                                                                                  | p<0.0001                                                                                                                              |
| <b>1B</b>  | TAG levels after Lp KD (Ovaries)        | Ln(x+1.1) transformation;<br>Linear Mixed Model at each timepoint                                             | (0h) dsRNA p=0.7964<br>replicate p=0.3755<br>(24h) dsRNA p<0.0001<br>replicate p=0.3400<br>(48h) dsRNA p<0.0001<br>replicate p=0.0109 |
| <b>1B</b>  | TAG levels after Lp KD (Midgut)         | Ln(x+1.1) transformation;<br>Linear Mixed Model at each timepoint                                             | (0h) dsRNA p=0.2984<br>replicate p=0.3317<br>(24h) dsRNA p<0.0001<br>replicate p=0.3573<br>(48h) dsRNA p<0.0001<br>replicate p=0.3228 |
| <b>2A</b>  | Egg number after Vg KD                  | Mann-Whitney test                                                                                             | p<0.0001                                                                                                                              |
| <b>2B</b>  | Fertility after Vg KD                   | Kruskal-Wallis test                                                                                           | dsLacZ vs dsVg: p<0.0001<br>dsLacZ vs dsVg#2: p<0.0001<br>dsVg vs dsVg#2: p>0.05                                                      |
| <b>2E</b>  | Triglycerides after Vg KD (ovaries 48h) | Unpaired t test on transformed data                                                                           | p=0.0222                                                                                                                              |
| <b>2F</b>  | Lp expression after Vg KD               | 4 <sup>th</sup> root transformation;<br>Linear Mixed Model followed by 5 post-hoc t-tests ( <b>Table S6</b> ) | timepoint p<0.0001<br>dsRNA p<0.0001<br>dsRNA x timepoint p=0.0032<br>replicate[rand] p=0.3090                                        |
| <b>3A</b>  | Vg upon rapamycin treatment             | Unpaired t test                                                                                               | p<0.0001                                                                                                                              |

|            |                                         |                                                                                                               |                                                                                                                                                                                                                                                                            |
|------------|-----------------------------------------|---------------------------------------------------------------------------------------------------------------|----------------------------------------------------------------------------------------------------------------------------------------------------------------------------------------------------------------------------------------------------------------------------|
| <b>3C</b>  | Lp mRNA levels upon rapamycin treatment | ANOVA                                                                                                         | LacZ Control vs. LacZ Rapamycin<br>p=0.9956<br>LacZ Control vs. Vg Control<br>p=0.0002<br>LacZ Control vs. Vg Rapamycin<br>p=0.2500<br>LacZ Rapamycin vs. Vg Control<br>p=0.0003<br>LacZ Rapamycin vs. Vg Rapamycin<br>p=0.3469<br>Vg Control vs. Vg Rapamycin<br>p=0.0226 |
| <b>4D</b>  | Embryo triglycerides                    | Unpaired t test                                                                                               | p=0.0496                                                                                                                                                                                                                                                                   |
| <b>S1A</b> | Lp expression after Lp KD               | 4 <sup>th</sup> root transformation;<br>Linear Mixed Model followed by 5 post-hoc t-tests ( <b>Table S6</b> ) | timepoint p<0.0001<br>dsRNA p<0.0001<br>dsRNA x timepoint p=0.0004<br>replicate[rand] p=0.478                                                                                                                                                                              |
| <b>S1B</b> | Vg expression after Lp KD               | 4 <sup>th</sup> root transformation;<br>Linear Mixed Model followed by 5 post-hoc t-tests ( <b>Table S6</b> ) | timepoint p<0.0001<br>dsRNA p=0.044<br>dsRNA x timepoint p=0.0001<br>replicate[rand] p=0.536<br>replicate x timepoint[rand] p=0.033                                                                                                                                        |
| <b>S1C</b> | Lp expression after Vg KD (Ovaries)     | Ln(x+1) transformation;<br>Linear Mixed Model followed by 3 post-hoc t-tests ( <b>Table S6</b> )              | timepoint p<0.0001<br>dsRNA p=0.0103<br>dsRNA x timepoint p=0.0192<br>replicate p=0.3836                                                                                                                                                                                   |
| <b>S1C</b> | Lp expression after Vg KD (Fatbody)     | No transformation;<br>Generalized Linear Model followed by 3 post-hoc t-tests ( <b>Table S6</b> )             | timepoint p<0.0001<br>dsRNA p=0.0148<br>dsRNA x timepoint p<0.0001<br>replicate p=0.0012                                                                                                                                                                                   |
| <b>S2A</b> | Vg expression after Vg KD               | 8 <sup>th</sup> root transformation;<br>Linear Mixed Model followed by 5 post-hoc t-tests ( <b>Table S6</b> ) | timepoint p<0.0001<br>dsRNA p<0.0001<br>dsRNA x timepoint p=0.0068<br>replicate[rand] p=0.6864                                                                                                                                                                             |
| <b>S2B</b> | Protein levels after Vg KD (Ovaries)    | No suitable transformation;<br>Generalized Linear Mixed Model at each timepoint                               | (0h) dsRNA p=0.8072<br>replicate p=0.4399<br>(24h) dsRNA p=0.0044<br>replicate p=0.0002<br>(48h) dsRNA p<0.0001<br>replicate p=0.0092                                                                                                                                      |



|            |                                                     |                                                                                                               |                                                                                                                                                                                                                                                                            |
|------------|-----------------------------------------------------|---------------------------------------------------------------------------------------------------------------|----------------------------------------------------------------------------------------------------------------------------------------------------------------------------------------------------------------------------------------------------------------------------|
| <b>S2C</b> | Amino acid levels after Vg KD (Ovaries)             | Square root transformation;<br>Linear Mixed Model at each timepoint                                           | (0h) dsRNA p=0.5067<br>replicate p=0.4232<br>(24h) dsRNA p=0.8833<br>replicate p=0.4843<br>(48h) dsRNA p=0.0163<br>replicate p=0.3562                                                                                                                                      |
| <b>S2D</b> | Lp expression after Vg KD#2                         | 4 <sup>th</sup> root transformation;<br>Linear Mixed Model followed by 3 post-hoc t-tests ( <b>Table S6</b> ) | timepoint p=0.0004<br>dsRNA p=0.1804<br>dsRNA x timepoint p=0.0409<br>replicate[rand] p=0.9751                                                                                                                                                                             |
| <b>S2E</b> | Vg expression after Lp KD (Ovaries)                 | Square root (x+0.03) transformation;<br>Linear Mixed Model followed by 3 post-hoc t-tests ( <b>Table S6</b> ) | timepoint p<0.0001<br>dsRNA p=0.0100<br>dsRNA x timepoint p=0.1130<br>replicate p=0.8073                                                                                                                                                                                   |
| <b>S2E</b> | Vg expression after Lp KD (Fatbody)                 | No transformation;<br>Linear Mixed Model followed by 3 post-hoc t-tests ( <b>Table S6</b> )                   | timepoint p=0.0004<br>dsRNA p=0.0025<br>dsRNA x timepoint p=0.5277<br>replicate p=0.6241                                                                                                                                                                                   |
| <b>S3A</b> | Protein levels after Vg KD (Fat body)               | Cube root transformation;<br>Linear Mixed Model at each timepoint                                             | (0h) dsRNA p=0.4585<br>replicate p=0.3221<br>(24h) dsRNA p<0.0001<br>replicate p=0.3232<br>(48h) dsRNA p<0.0001<br>replicate p=0.3260                                                                                                                                      |
| <b>S3B</b> | pS6K expression after Vg KD (Fatbody)               | No transformation;<br>Generalized Linear Model followed by 4 post-hoc t-tests ( <b>Table S6</b> )             | timepoint p<0.0001<br>dsRNA p=0.1251<br>dsRNA x timepoint p<0.0001<br>replicate p=0.0084                                                                                                                                                                                   |
| <b>S3C</b> | Phospho S6K protein levels upon rapamycin treatment | ANOVA                                                                                                         | LacZ Control vs. LacZ Rapamycin<br>p=0.9976<br>LacZ Control vs. Vg Control<br>p<0.0001<br>LacZ Control vs. Vg Rapamycin<br>p=0.0072<br>LacZ Rapamycin vs. Vg Control<br>p<0.0001<br>LacZ Rapamycin vs. Vg Rapamycin<br>p=0.0100<br>Vg Control vs. Vg Rapamycin<br>p=0.0102 |
| <b>S3D</b> | Lp protein levels upon                              | ANOVA                                                                                                         | LacZ Control vs. LacZ Rapamycin                                                                                                                                                                                                                                            |

|            |                                            |                                                                        |                                                                                                                                                                                                                                                                                              |
|------------|--------------------------------------------|------------------------------------------------------------------------|----------------------------------------------------------------------------------------------------------------------------------------------------------------------------------------------------------------------------------------------------------------------------------------------|
|            | rapamycin treatment                        |                                                                        | <p>p&gt;0.9999<br/>LacZ Control vs. Vg Control<br/>p=0.0185<br/>LacZ Control vs. Vg Rapamycin<br/>p=0.2184<br/>LacZ Rapamycin vs. Vg Control<br/>p=0.0172<br/>LacZ Rapamycin vs. Vg Rapamycin<br/>p=0.2044<br/>Vg Control vs. Vg Rapamycin<br/>p=0.4834</p>                                  |
| <b>S3E</b> | Triglycerides upon rapamycin treatment     | ANOVA                                                                  | <p>LacZ Control vs. LacZ Rapamycin<br/>P=0.9860<br/>LacZ Control vs. Vg Control<br/>p=0.0030<br/>LacZ Control vs. Vg Rapamycin<br/>p=0.2565<br/>LacZ Rapamycin vs. Vg Control<br/>p=0.0018<br/>LacZ Rapamycin vs. Vg Rapamycin<br/>p=0.1618<br/>Vg Control vs. Vg Rapamycin<br/>p=0.2566</p> |
| <b>S3F</b> | Amino acid levels after Vg KD (Fat body)   | No transformation<br>Linear Mixed Model<br>at each timepoint           | <p>(0h) dsRNA p=0.8672<br/>replicate p=0.3832<br/>(12h) dsRNA p=0.1087<br/>replicate p=0.3257<br/>(24h) dsRNA p=0.0064<br/>replicate p=0.3201<br/>(48h) dsRNA p=0.0027<br/>replicate p=0.4067</p>                                                                                            |
| <b>S3G</b> | Amino acid levels after Vg KD (Hemolymph)  | No transformation<br>Linear Mixed Model<br>at each timepoint           | <p>(0h) dsRNA p=0.7177<br/>replicate p=0.7615<br/>(12h) dsRNA p=0.6672<br/>replicate p=0.4125<br/>(24h) dsRNA p=0.2457<br/>replicate p=0.3536<br/>(48h) dsRNA p=0.8222<br/>replicate p=0.7415</p>                                                                                            |
| <b>S3H</b> | ILP1 expression after Vg KD (2 replicates) | arcsine transformation;<br>Linear Mixed Model<br>No post-hoc t-testing | <p>timepoint p&lt;0.0001<br/>dsRNA p=0.426</p>                                                                                                                                                                                                                                               |

|            |                                   |                                                                                     |                                     |
|------------|-----------------------------------|-------------------------------------------------------------------------------------|-------------------------------------|
|            | ILP2<br>expression after Vg<br>KD | arcsine transformation;<br>Linear Mixed Model<br>No post-hoc t-testing              | timepoint p=0.0089<br>dsRNA p=0.920 |
|            | ILP3<br>expression after Vg<br>KD | No transformation;<br>Linear Mixed Model<br>No post-hoc t-testing                   | timepoint p=0.248<br>dsRNA p=0.367  |
|            | ILP4<br>expression after Vg<br>KD | No transformation;<br>Linear Mixed Model<br>No post-hoc t-testing                   | timepoint p=0.002<br>dsRNA p=0.408  |
|            | ILP5<br>expression after Vg<br>KD | 5 <sup>th</sup> root transformation;<br>Linear Mixed Model<br>No post-hoc t-testing | timepoint p=0.002<br>dsRNA p=0.241  |
| <b>S4B</b> | Embryo total<br>lipids            | Unpaired t test                                                                     | p=0.1606                            |

**Supplemental Table 6.** Post-hoc testing for significant differences using an FDR of 0.05. See

**Supplemental Table 5.**

| <b>2F<br/>Lp after Vg KD</b>  | <b>p-value</b>         | <b>FDR-adjusted<br/>p-value</b>  | <b>Significant?</b> |
|-------------------------------|------------------------|----------------------------------|---------------------|
| dsLacZ – dsVg at 0h           | 0.6414                 | 0.6414                           | No                  |
| dsLacZ – dsVg at 12h          | 0.0731                 | 0.0914                           | No                  |
| dsLacZ – dsVg at 24h          | $4.13 \times 10^{-6}$  | $2.07 \times 10^{-5}$            | Yes                 |
| dsLacZ – dsVg at 36h          | 0.0020                 | 0.0050                           | Yes                 |
| dsLacZ – dsVg at 48h          | 0.0450                 | 0.0750                           | No                  |
| <b>S1B<br/>Vg after Lp KD</b> | <b>p-value</b>         | <b>FDR-adjusted<br/>p-value</b>  | <b>Significant?</b> |
| dsLacZ – dsLp at 0h           | 0.9198                 | 0.9198                           | No                  |
| dsLacZ – dsLp at 12h          | 0.7704                 | 0.9198                           | No                  |
| dsLacZ – dsLp at 24h          | 0.0029                 | 0.0048                           | Yes                 |
| dsLacZ – dsLp at 36h          | 0.0028                 | 0.0048                           | Yes                 |
| dsLacZ – dsLp at 48h          | $7.55 \times 10^{-5}$  | $3.78 \times 10^{-4}$            | Yes                 |
| <b>S1A<br/>Lp after Lp KD</b> | <b>p-value</b>         | <b>FDR-adjusted<br/>p-value</b>  | <b>Significant?</b> |
| dsLacZ – dsLp at 0h           | $2.64 \times 10^{-5}$  | $6.60 \times 10^{-5}$            | Yes                 |
| dsLacZ – dsLp at 12h          | $4.36 \times 10^{-7}$  | $2.18 \times 10^{-6}$            | Yes                 |
| dsLacZ – dsLp at 24h          | 0.0138                 | 0.0173                           | Yes                 |
| dsLacZ – dsLp at 36h          | 0.8884                 | 0.8884                           | No                  |
| dsLacZ – dsLp at 48h          | $2.67 \times 10^{-4}$  | $4.45 \times 10^{-4}$            | Yes                 |
| <b>S1C (Ovaries)</b>          | <b>p-value</b>         | <b>FDR-adjusted p-<br/>value</b> | <b>Significant?</b> |
| dsLacZ – dsVg at 0h           | 0.7766                 | 0.7766                           | No                  |
| dsLacZ – dsVg at 24h          | 0.6119                 | 0.7766                           | No                  |
| dsLacZ – dsVg at 48h          | 0.0009                 | 0.0027                           | Yes                 |
| <b>S1C (Fat body)</b>         | <b>p-value</b>         | <b>FDR-adjusted p-<br/>value</b> | <b>Significant?</b> |
| dsLacZ – dsVg at 0h           | 0.7447                 | 0.7447                           | No                  |
| dsLacZ – dsVg at 24h          | 0.1780                 | 0.2670                           | No                  |
| dsLacZ – dsVg at 48h          | $2.86 \times 10^{-10}$ | $8.56 \times 10^{-10}$           | Yes                 |
| <b>S2A<br/>Vg after Vg KD</b> | <b>p-value</b>         | <b>FDR-adjusted<br/>p-value</b>  | <b>Significant?</b> |
| dsLacZ – dsVg at 0h           | 0.9000                 | 0.9000                           | No                  |
| dsLacZ – dsVg at 12h          | 0.0057                 | 0.0115                           | Yes                 |
| dsLacZ – dsVg at 24h          | $2.94 \times 10^{-5}$  | $1.47 \times 10^{-4}$            | Yes                 |
| dsLacZ – dsVg at 36h          | 0.0069                 | 0.0115                           | Yes                 |
| dsLacZ – dsVg at 48h          | 0.5501                 | 0.6877                           | No                  |

| <b>S2D<br/>Lp after Vg KD#2</b> | <b>p-value</b>         | <b>FDR-adjusted<br/>p-value</b>  | <b>Significant?</b> |
|---------------------------------|------------------------|----------------------------------|---------------------|
| dsLacZ – dsVg at 0h             | 0.3785                 | 0.5678                           | No                  |
| dsLacZ – dsVg at 24h            | 0.0098                 | 0.0294                           | Yes                 |
| dsLacZ – dsVg at 48h            | 0.8191                 | 0.8191                           | No                  |
| <b>S2E (Ovaries)</b>            | <b>p-value</b>         | <b>FDR-adjusted p-<br/>value</b> | <b>Significant?</b> |
| dsLacZ – dsVg at 0h             | 0.9392                 | 0.9392                           | No                  |
| dsLacZ – dsVg at 24h            | 0.0210                 | 0.0315                           | Yes                 |
| dsLacZ – dsVg at 48h            | 0.0177                 | 0.0315                           | No                  |
| <b>S2E (Fat body)</b>           | <b>p-value</b>         | <b>FDR-adjusted p-<br/>value</b> | <b>Significant?</b> |
| dsLacZ – dsVg at 0h             | 0.1927                 | 0.1927                           | No                  |
| dsLacZ – dsVg at 24h            | 0.0133                 | 0.0399                           | Yes                 |
| dsLacZ – dsVg at 48h            | 0.0298                 | 0.0447                           | Yes                 |
| <b>S3A (Fat body)</b>           | <b>p-value</b>         | <b>FDR-adjusted p-<br/>value</b> | <b>Significant?</b> |
| dsLacZ – dsVg at 0h             | 0.9058                 | 0.9058                           | No                  |
| dsLacZ – dsVg at 12h            | 0.1829                 | 0.3658                           | No                  |
| dsLacZ – dsVg at 24h            | $8.06 \times 10^{-25}$ | $3.22 \times 10^{-24}$           | Yes                 |
| dsLacZ – dsVg at 48h            | 0.6257                 | 0.8343                           | No                  |
